# Supplementary material
Source: publisher figshare collection journal article supplement (https://acs.figshare.com/ndownloader/files/4656295)

## Supporting Information

### Iriomoteolide-3a, a Cytotoxic 15-Membered Macrolide from a Marine Dinoflagellate *Amphidinium* Species

Keiko Oguchi,<sup>†</sup> Masashi Tsuda,<sup>\*,‡</sup> Rie Iwamoto,<sup>†</sup> Yumiko Okamoto,<sup>†</sup> Jun'ichi Kobayashi,<sup>†</sup>  
Eri Fukushi,<sup>§</sup> Jun Kawabata,<sup>§</sup> Tomoko Ozawa,<sup>"</sup> Atsunori Masuda,<sup>"</sup> Yoshiaki Kitaya,<sup>±</sup>  
and Kenji Omasa<sup>†</sup>

Graduate School of Pharmaceutical Sciences, Hokkaido University, Sapporo 060-0812, Japan, Center  
for Advanced Marine Core Research, Kochi University, Kochi 783-8502, Japan, Graduate School of  
Agriculture, Hokkaido University, Sapporo 060-8589, Japan, MARINE FARM, Yanmar Co. Ltd., Oita  
873-0421, Japan, Graduate School of Life and Environmental Sciences, Osaka Prefecture University,  
Osaka 599-8531, Japan, and Graduate School of Agricultural and Life Sciences, The University of  
Tokyo, Tokyo 113-8657, Japan

|                                                                                                                                                                            |      |
|----------------------------------------------------------------------------------------------------------------------------------------------------------------------------|------|
| <b>Contents</b>                                                                                                                                                            | page |
| <b>Table S1</b>                                                                                                                                                            | S3   |
| <b>General Methods</b>                                                                                                                                                     | S5   |
| <b>Figure S1.</b> $^1\text{H}$ NMR spectrum of iriomoteolide-3a ( <b>1</b> ) in $\text{CDCl}_3$ .                                                                          | S6   |
| <b>Figure S2.</b> $^{13}\text{C}$ NMR spectrum of iriomoteolide-3a ( <b>1</b> ) in $\text{CDCl}_3$ .                                                                       | S7   |
| <b>Figure S3.</b> $^1\text{H}$ - $^1\text{H}$ COSY spectrum of iriomoteolide-3a ( <b>1</b> ) in $\text{CDCl}_3$ .                                                          | S8   |
| <b>Figure S4.</b> TOCSY spectrum of iriomoteolide-3a ( <b>1</b> ) in $\text{CDCl}_3$ .                                                                                     | S9   |
| <b>Figure S5.</b> HMQC spectrum of iriomoteolide-3a ( <b>1</b> ) in $\text{CDCl}_3$ .                                                                                      | S10  |
| <b>Figure S6.</b> Phase-sensitive HMBC spectrum of iriomoteolide-3a ( <b>1</b> ) in $\text{CDCl}_3$ .                                                                      | S11  |
| <b>Figure S7.</b> NOESY spectrum of iriomoteolide-3a ( <b>1</b> ) in $\text{CDCl}_3$ .                                                                                     | S12  |
| <b>Figure S8.</b> $^1\text{H}$ NMR spectrum of 7,8- <i>O</i> -isopropylidene derivative ( <b>2</b> ) of iriomoteolide-3a ( <b>1</b> ) in $\text{CDCl}_3$ .                 | S13  |
| <b>Figure S9.</b> $^1\text{H}$ - $^1\text{H}$ COSY spectrum of 7,8- <i>O</i> -isopropylidene derivative ( <b>2</b> ) of iriomoteolide-3a ( <b>1</b> ) in $\text{CDCl}_3$ . | S14  |
| <b>Figure S10.</b> NOESY spectrum of 7,8- <i>O</i> -isopropylidene derivative ( <b>2</b> ) of iriomoteolide-3a ( <b>1</b> ) in $\text{CDCl}_3$ .                           | S15  |
| <b>Figure S11.</b> $^1\text{H}$ NMR spectrum of 7,8,15-tris-( <i>S</i> )-MTPA ester ( <b>3a</b> ) of iriomoteolide-3a ( <b>1</b> ) in $\text{CDCl}_3$ .                    | S16  |
| <b>Figure S12.</b> $^1\text{H}$ NMR spectrum of 7,8,15-tris-( <i>R</i> )-MTPA ester ( <b>3b</b> ) of iriomoteolide-3a ( <b>1</b> ) in $\text{CDCl}_3$ .                    | S17  |
| <b>Figure S13.</b> $^1\text{H}$ NMR signals for H-7 and H-8 a) of natural iriomoteolide-3a ( <b>1</b> ) and b) simulated by NMRPEAK.exe program.                           | S18  |

Table S1.  $^1\text{H}$  and  $^{13}\text{C}$  NMR Data of Iriomoteolide-3a (**1**) in  $\text{CDCl}_3$ .

| position | $^{13}\text{C}$      | $^1\text{H}$                                           |
|----------|----------------------|--------------------------------------------------------|
| 1        | 172.6 C              |                                                        |
| 2        | 37.7 $\text{CH}_2$   | 2.38 dd, 2.4, 14.0<br>1.98 dd, 7.8, 14.0               |
| 3        | 29.8 CH              | 2.10 m                                                 |
| 4        | 36.0 $\text{CH}_2$   | 2.32 ddd, 4.0, 10.0, 13.8<br>1.82 ddd, 4.0, 8.9, 13.8  |
| 5        | 133.2 CH             | 5.77 ddd, 4.0, 10.0, 16.3                              |
| 6        | 131.3 CH             | 5.40 m                                                 |
| 7        | 76.7 <sup>a</sup> CH | 3.965 m <sup>b</sup>                                   |
| 8        | 76.6 <sup>a</sup> CH | 3.955 m <sup>b</sup>                                   |
| 9        | 135.8 CH             | 5.79 m                                                 |
| 10       | 132.5 CH             | 5.25 dd, 9.8, 15.5                                     |
| 11       | 59.0 CH              | 3.00 dd, 2.3, 9.8                                      |
| 12       | 57.7 CH              | 2.90 dt, 9.8, 2.3                                      |
| 13       | 34.3 $\text{CH}_2$   | 2.26 dt, 14.0, 2.3<br>1.48 ddd, 9.8, 10.4, 14.0        |
| 14       | 72.7 CH              | 5.11 ddd, 2.3, 3.4, 10.4                               |
| 15       | 70.8 CH              | 3.60 br dt, 10.0, 3.6                                  |
| 16       | 40.6 $\text{CH}_2$   | 1.39 ddd, 4.0, 10.0, 13.9<br>1.27 ddd, 3.6, 10.7, 13.9 |
| 17       | 33.3 CH              | 2.35 m                                                 |
| 18       | 135.3 CH             | 5.20 dd, 8.5, 15.5                                     |
| 19       | 128.6 CH             | 5.45 m                                                 |

|    |       |                 |                   |        |
|----|-------|-----------------|-------------------|--------|
| 20 | 35.4  | CH <sub>2</sub> | 2.66 <sup>c</sup> | m      |
| 21 | 129.5 | CH              | 5.38              | m      |
| 22 | 125.6 | CH              | 5.40              | m      |
| 23 | 17.8  | CH <sub>3</sub> | 1.64 <sup>d</sup> | d, 6.6 |
| 24 | 20.7  | CH <sub>3</sub> | 1.01 <sup>d</sup> | d, 6.6 |
| 25 | 21.6  | CH <sub>3</sub> | 1.01 <sup>d</sup> | d, 6.6 |

<sup>a</sup>These signals were interchangeable. <sup>b</sup>Although these signals were overlapped with each other,  $J(\text{H-6/H-7})$ ,  $J(\text{H-7/H-8})$ , and  $J(\text{H-8/H-9})$  values were approximately 8.6 Hz. <sup>c</sup>2H. <sup>d</sup>3H.

**General Methods.**

NMR data in CDCl<sub>3</sub> (99.96% deuteration degree) were obtained using 2.5 mm micro cells for CDCl<sub>3</sub>, and measured on a 600 MHz spectrometer equipped with 2.5 mm inverse probe or 500 MHz spectrometer equipped with 2.5 mm dual probe. For the phase-sensitive HMBC spectrum, the mixing time  $\Delta$  was set to 60 msec. Positive- and negative-mode ESIMS spectra were measured at -80 V as a focus voltage using a sample dissolved in MeOH with flow rate of 200  $\mu$ L/min. NMR simulations were carried out using NMRPEAK.exe program by Dr. H. Nakamura.

Figure S1.  $^1\text{H}$  NMR spectrum of iriomoteolide-3a (**1**) in  $\text{CDCl}_3$ .

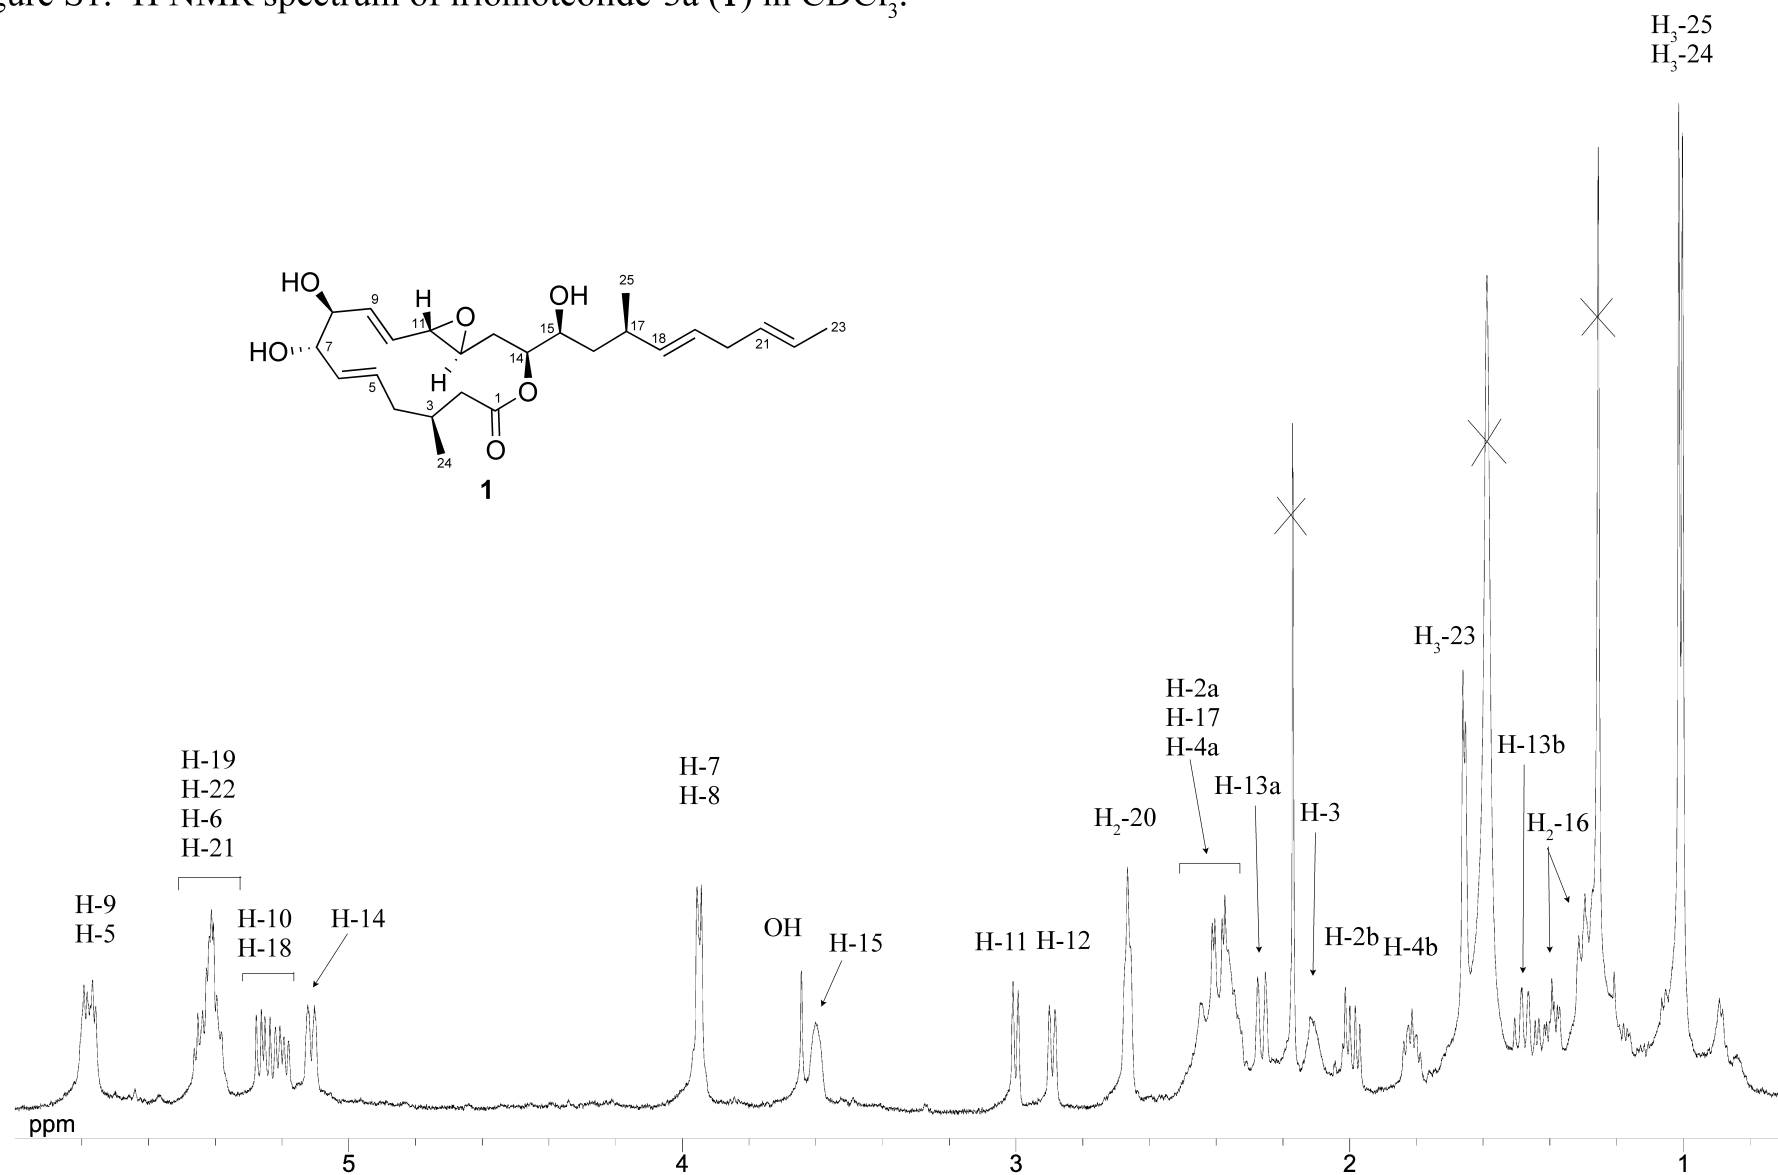

Figure S2.  $^{13}\text{C}$  NMR spectrum of iriomoteolide-3a (1) in  $\text{CDCl}_3$ .

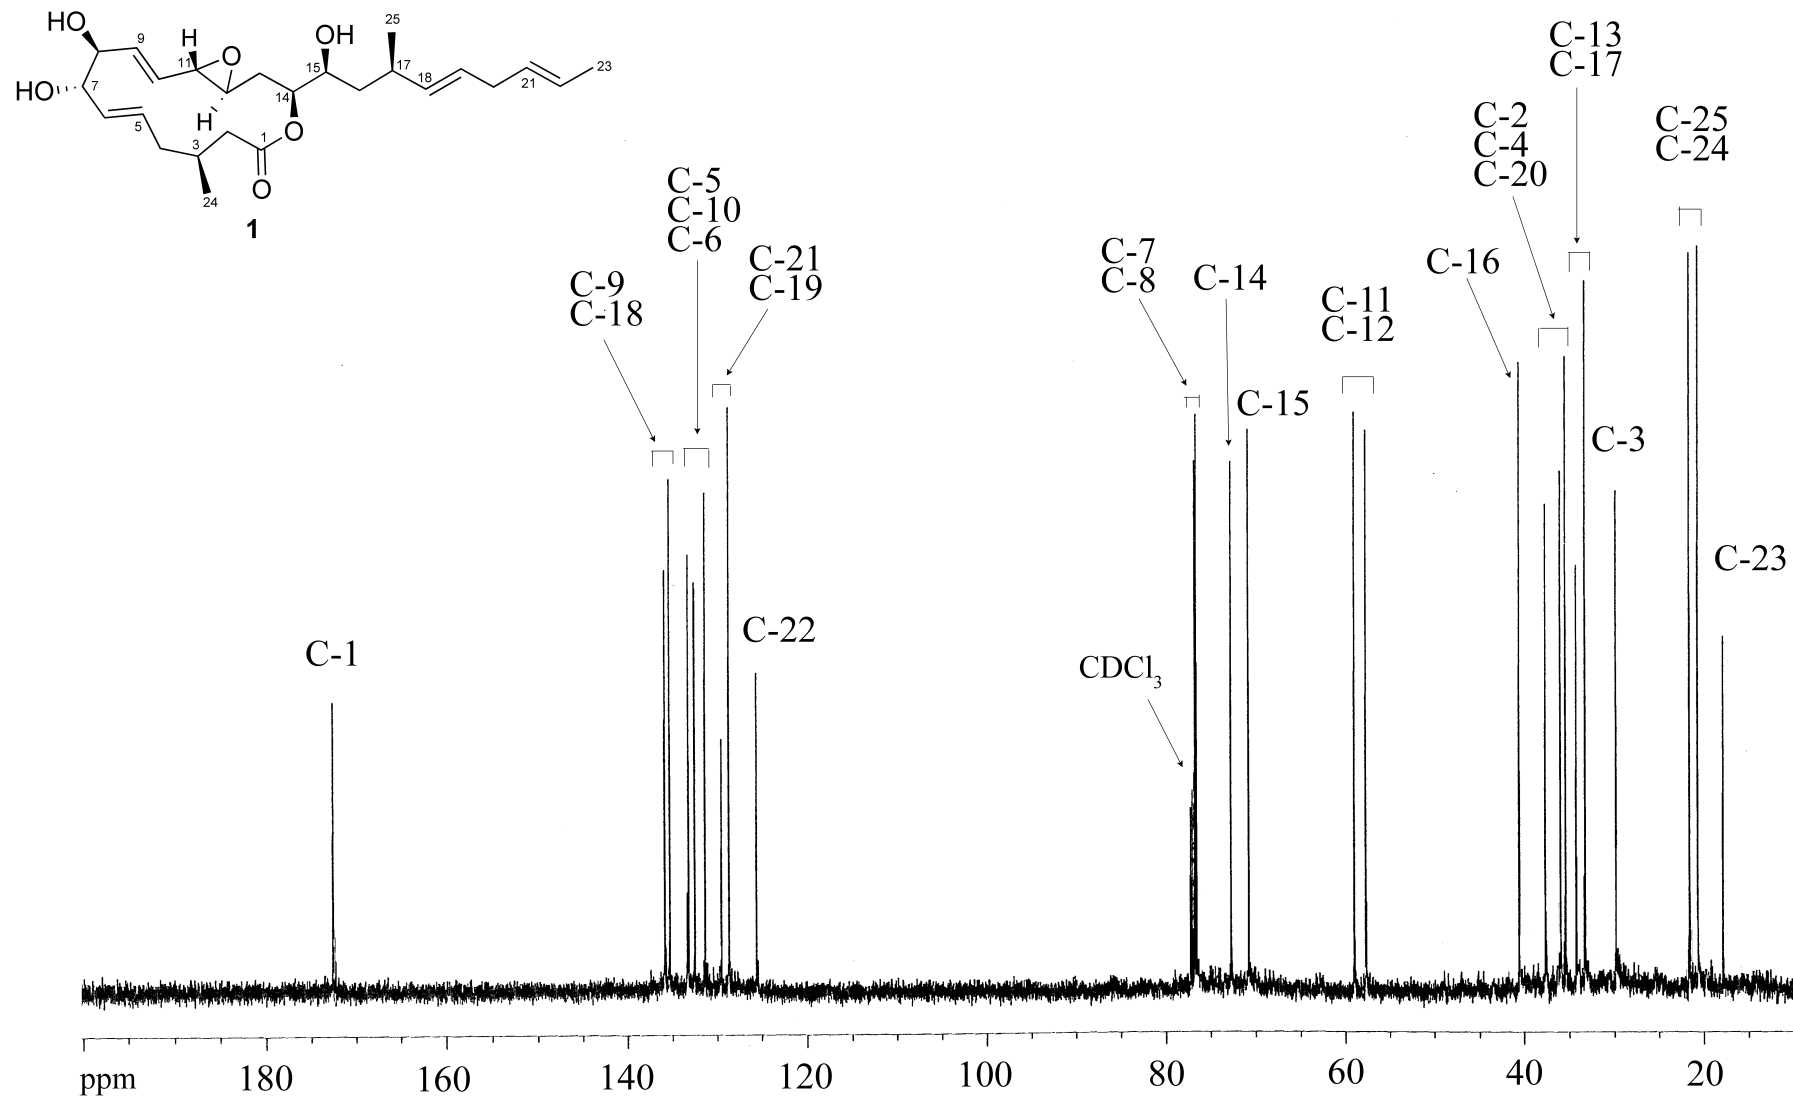

Figure S3.  $^1\text{H}$ - $^1\text{H}$  COSY spectrum of iriomoteolide-3a (1) in  $\text{CDCl}_3$ .

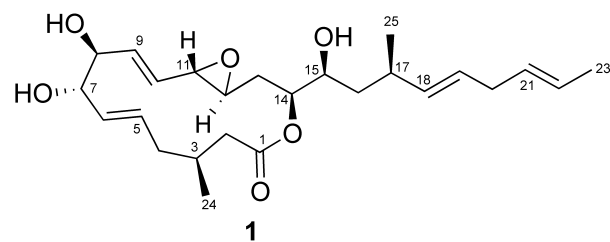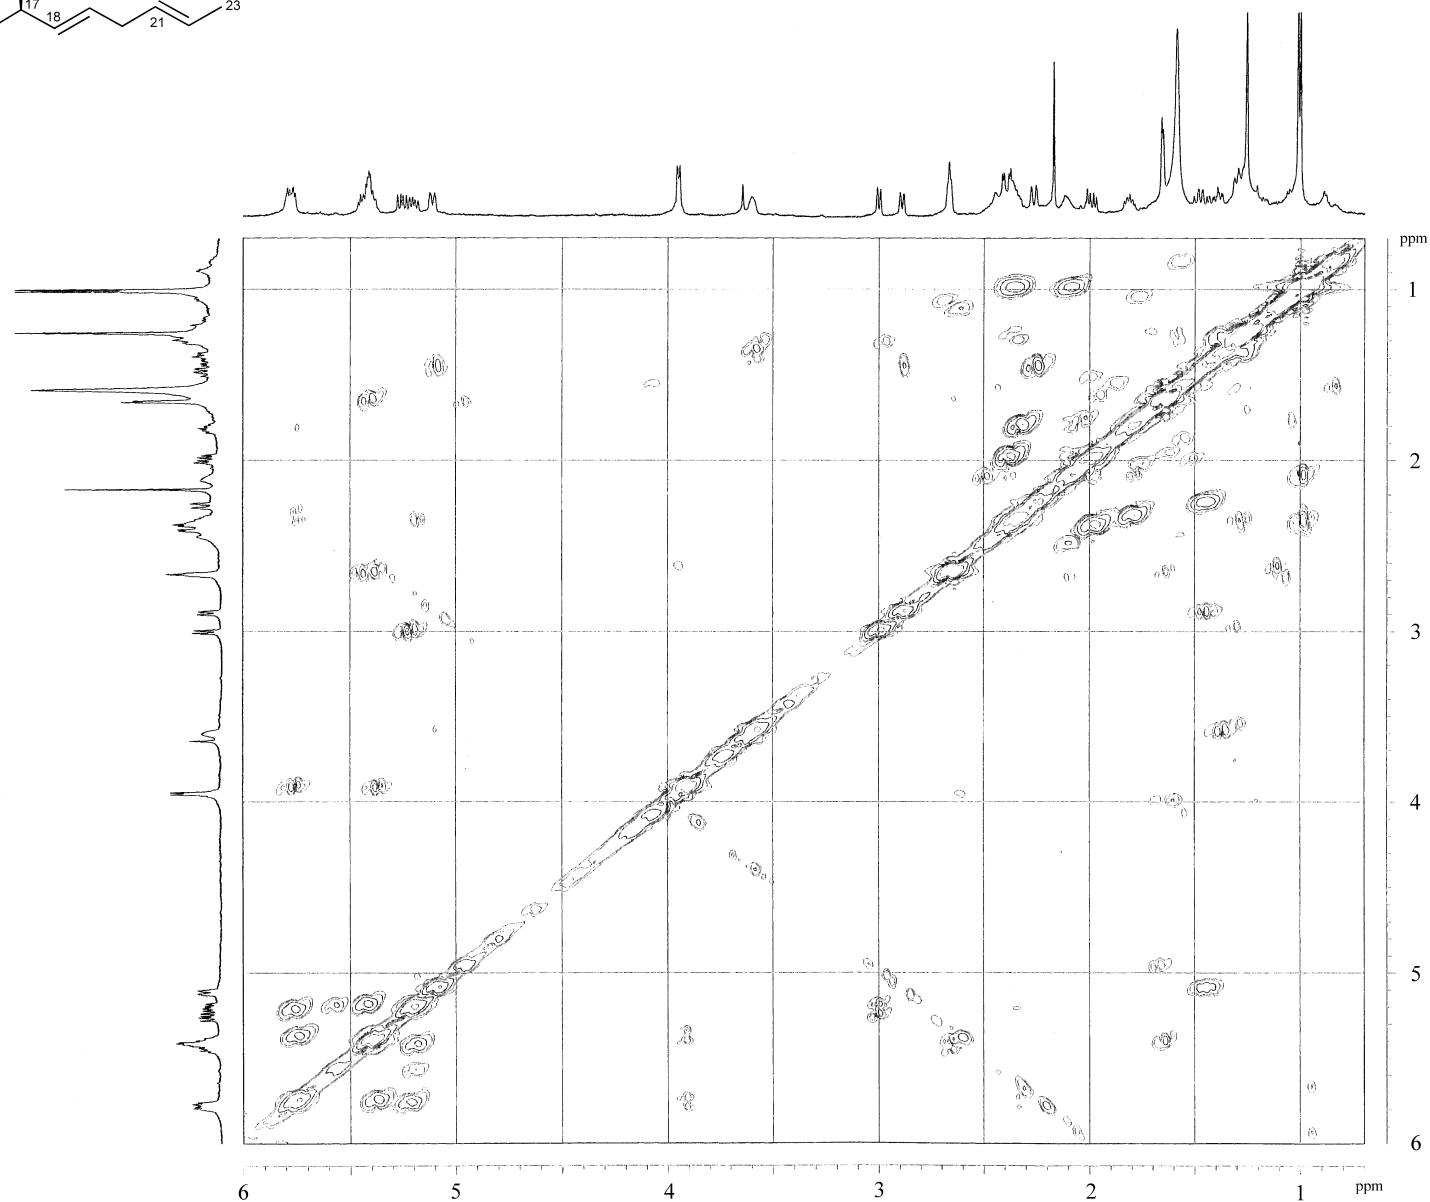

Figure S4. TOCSY spectrum of iriomoteolide-3a (1) in  $\text{CDCl}_3$ .

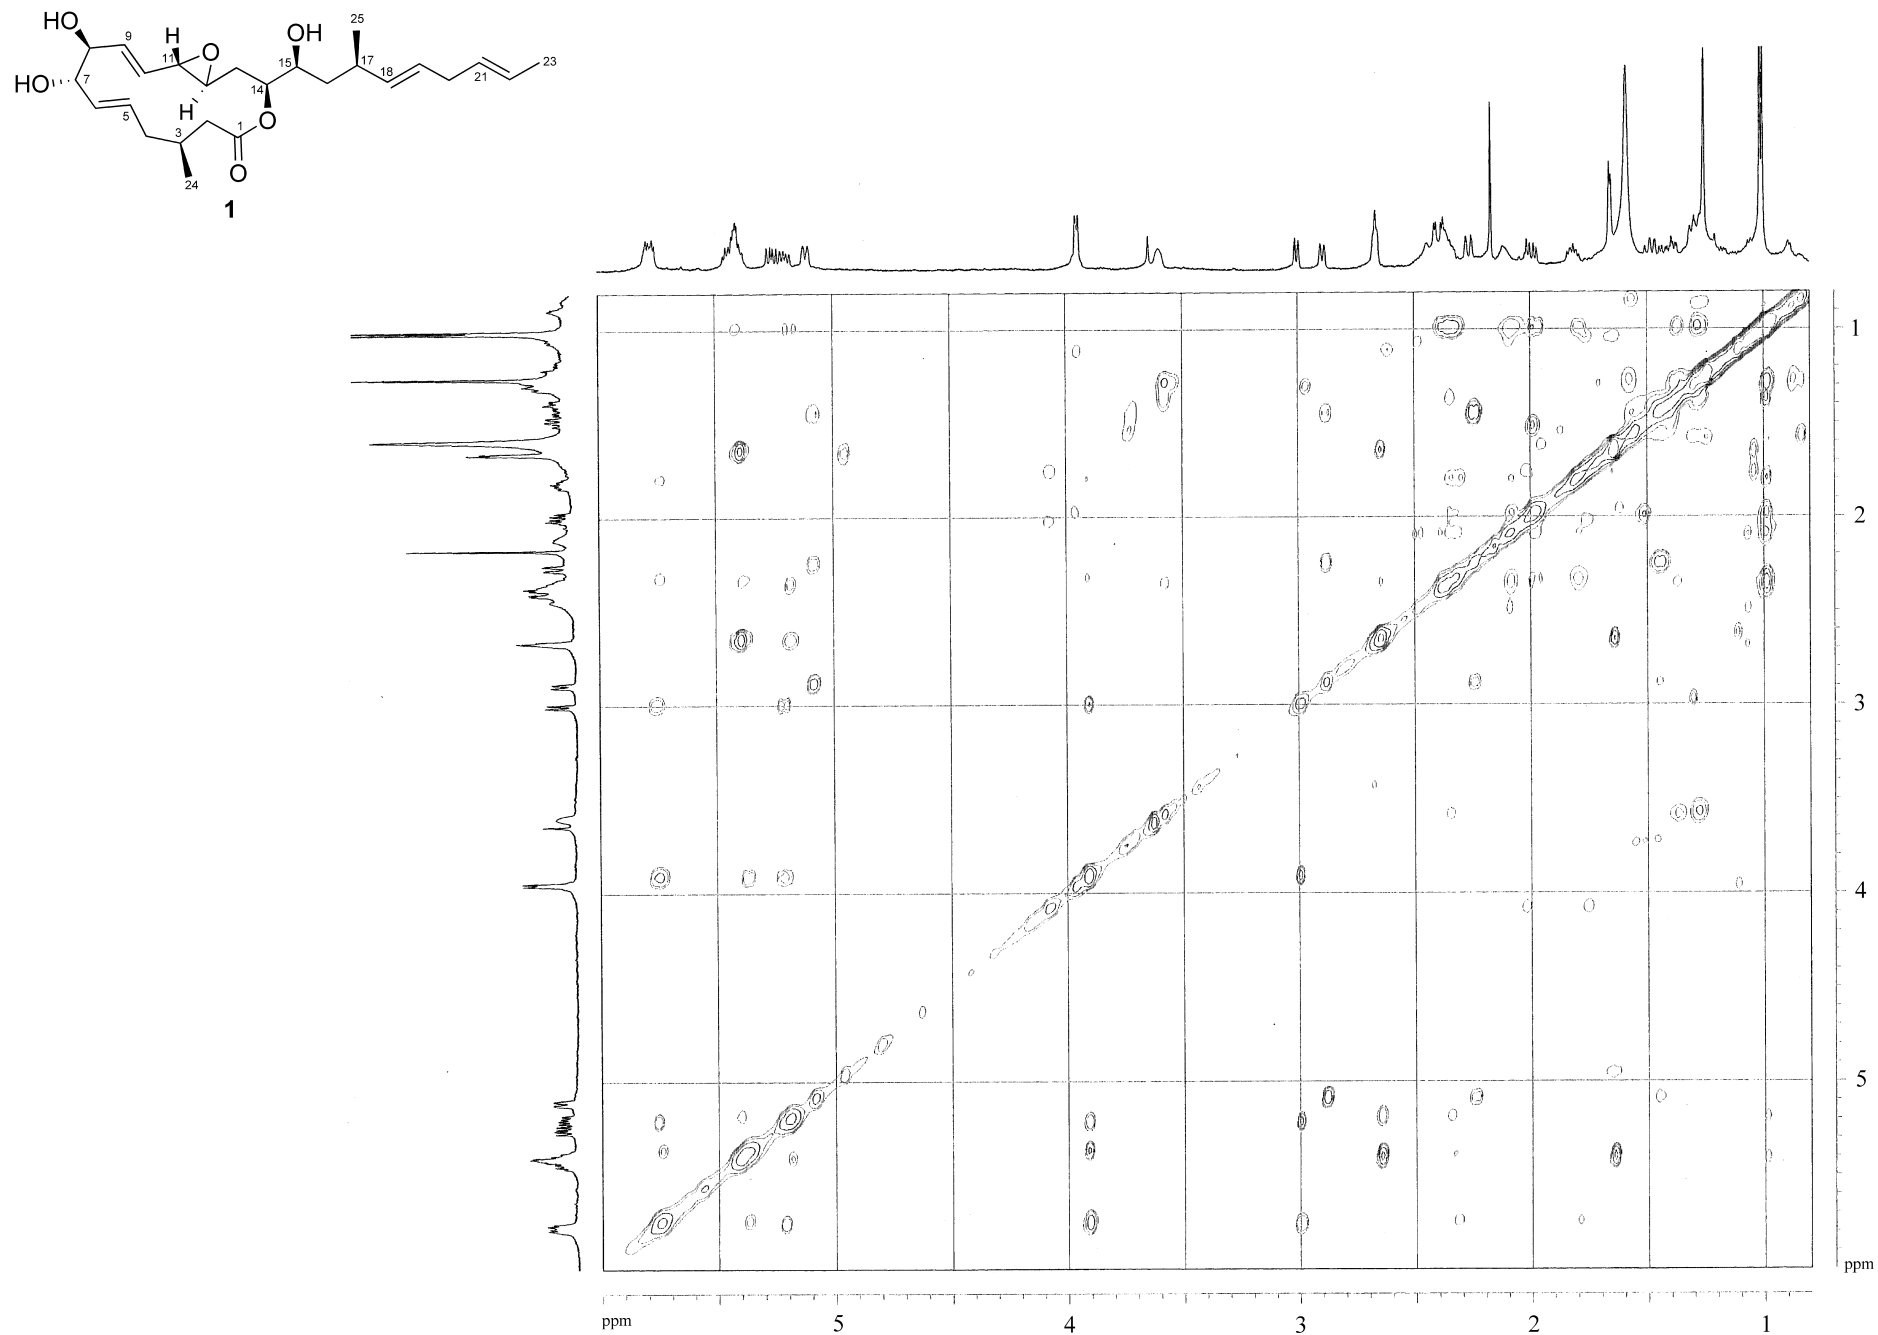

Figure S5. HMQC spectrum of iriomoteolide-3a (1) in CDCl<sub>3</sub>.

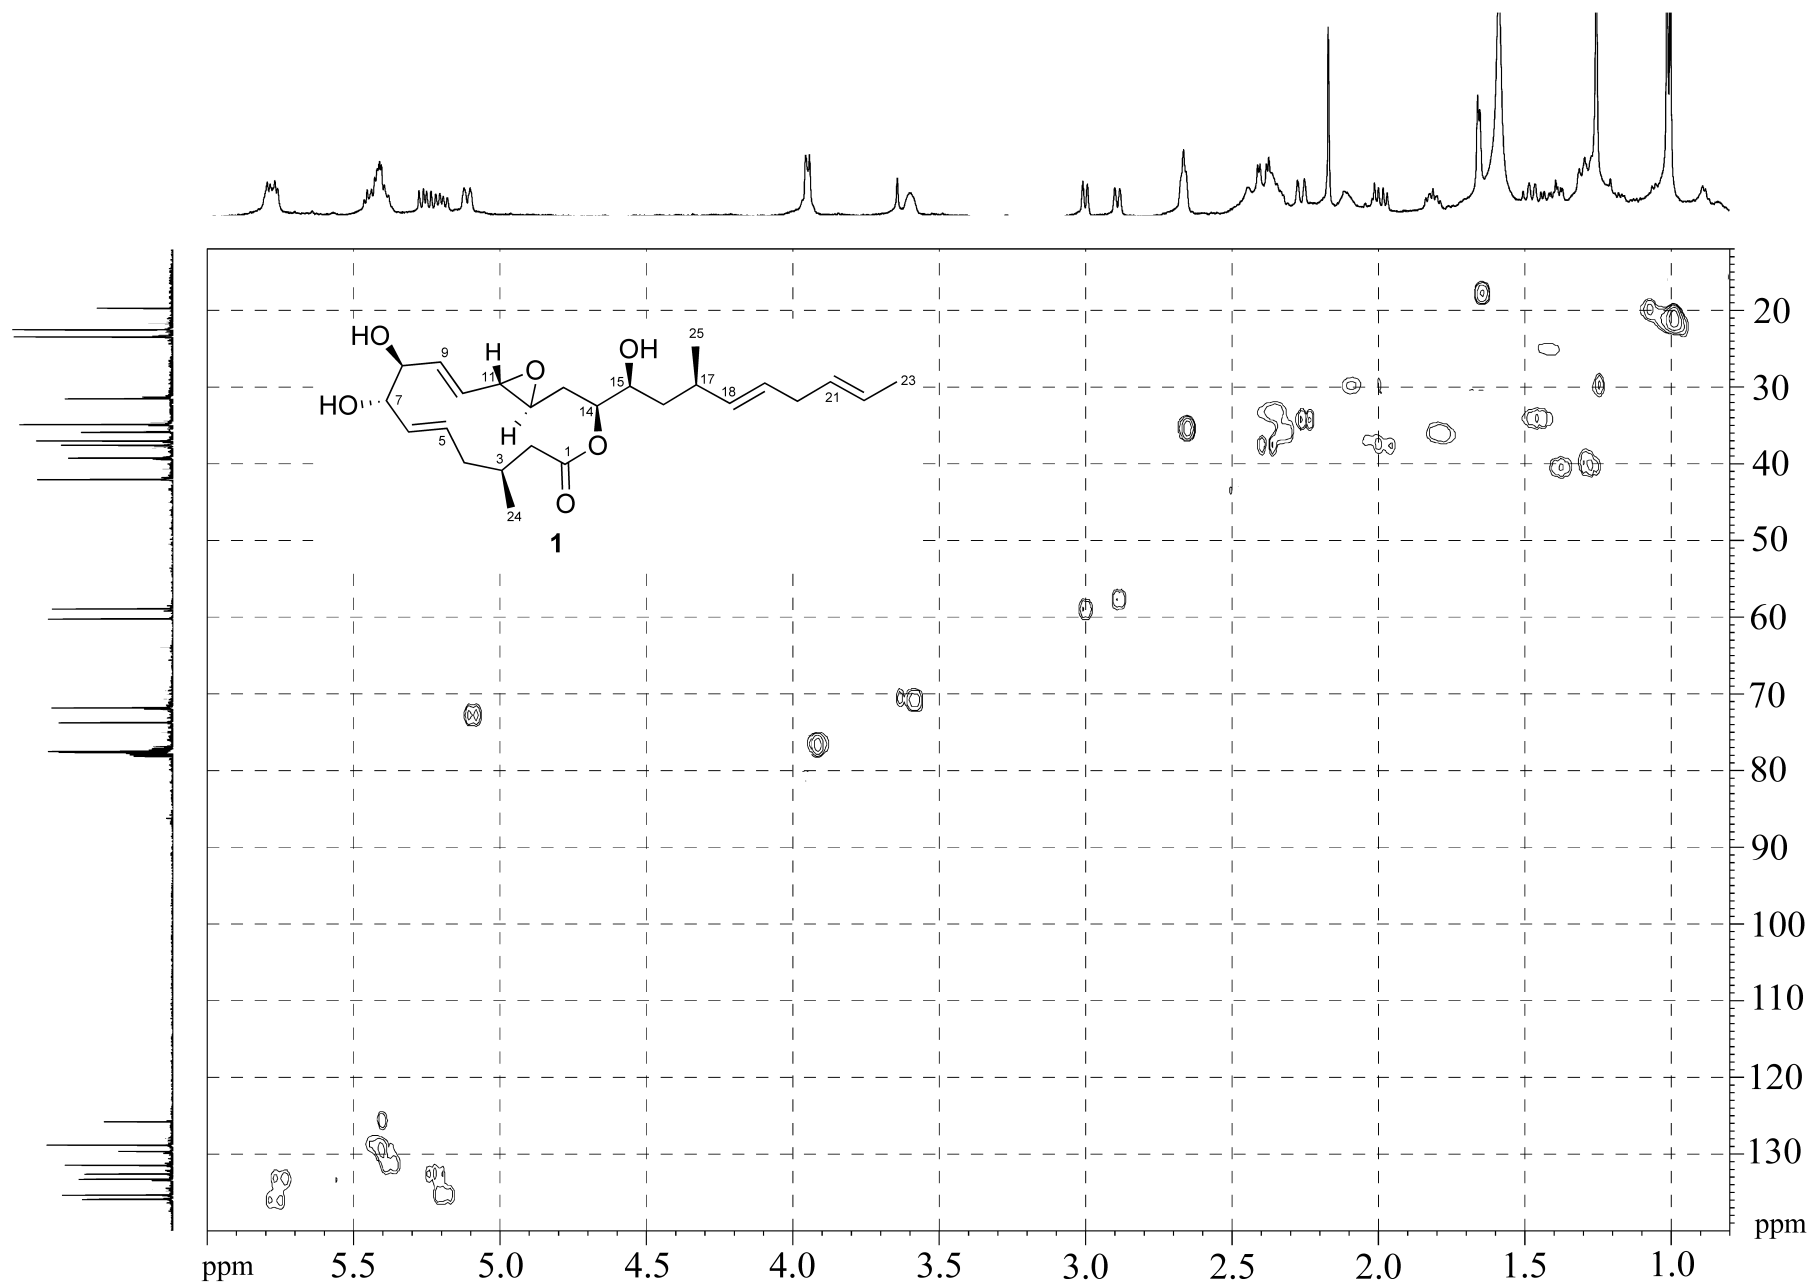

Figure S6. Phase-sensitive HMBC spectrum of iriomoteolide-3a (1) in  $\text{CDCl}_3$ .

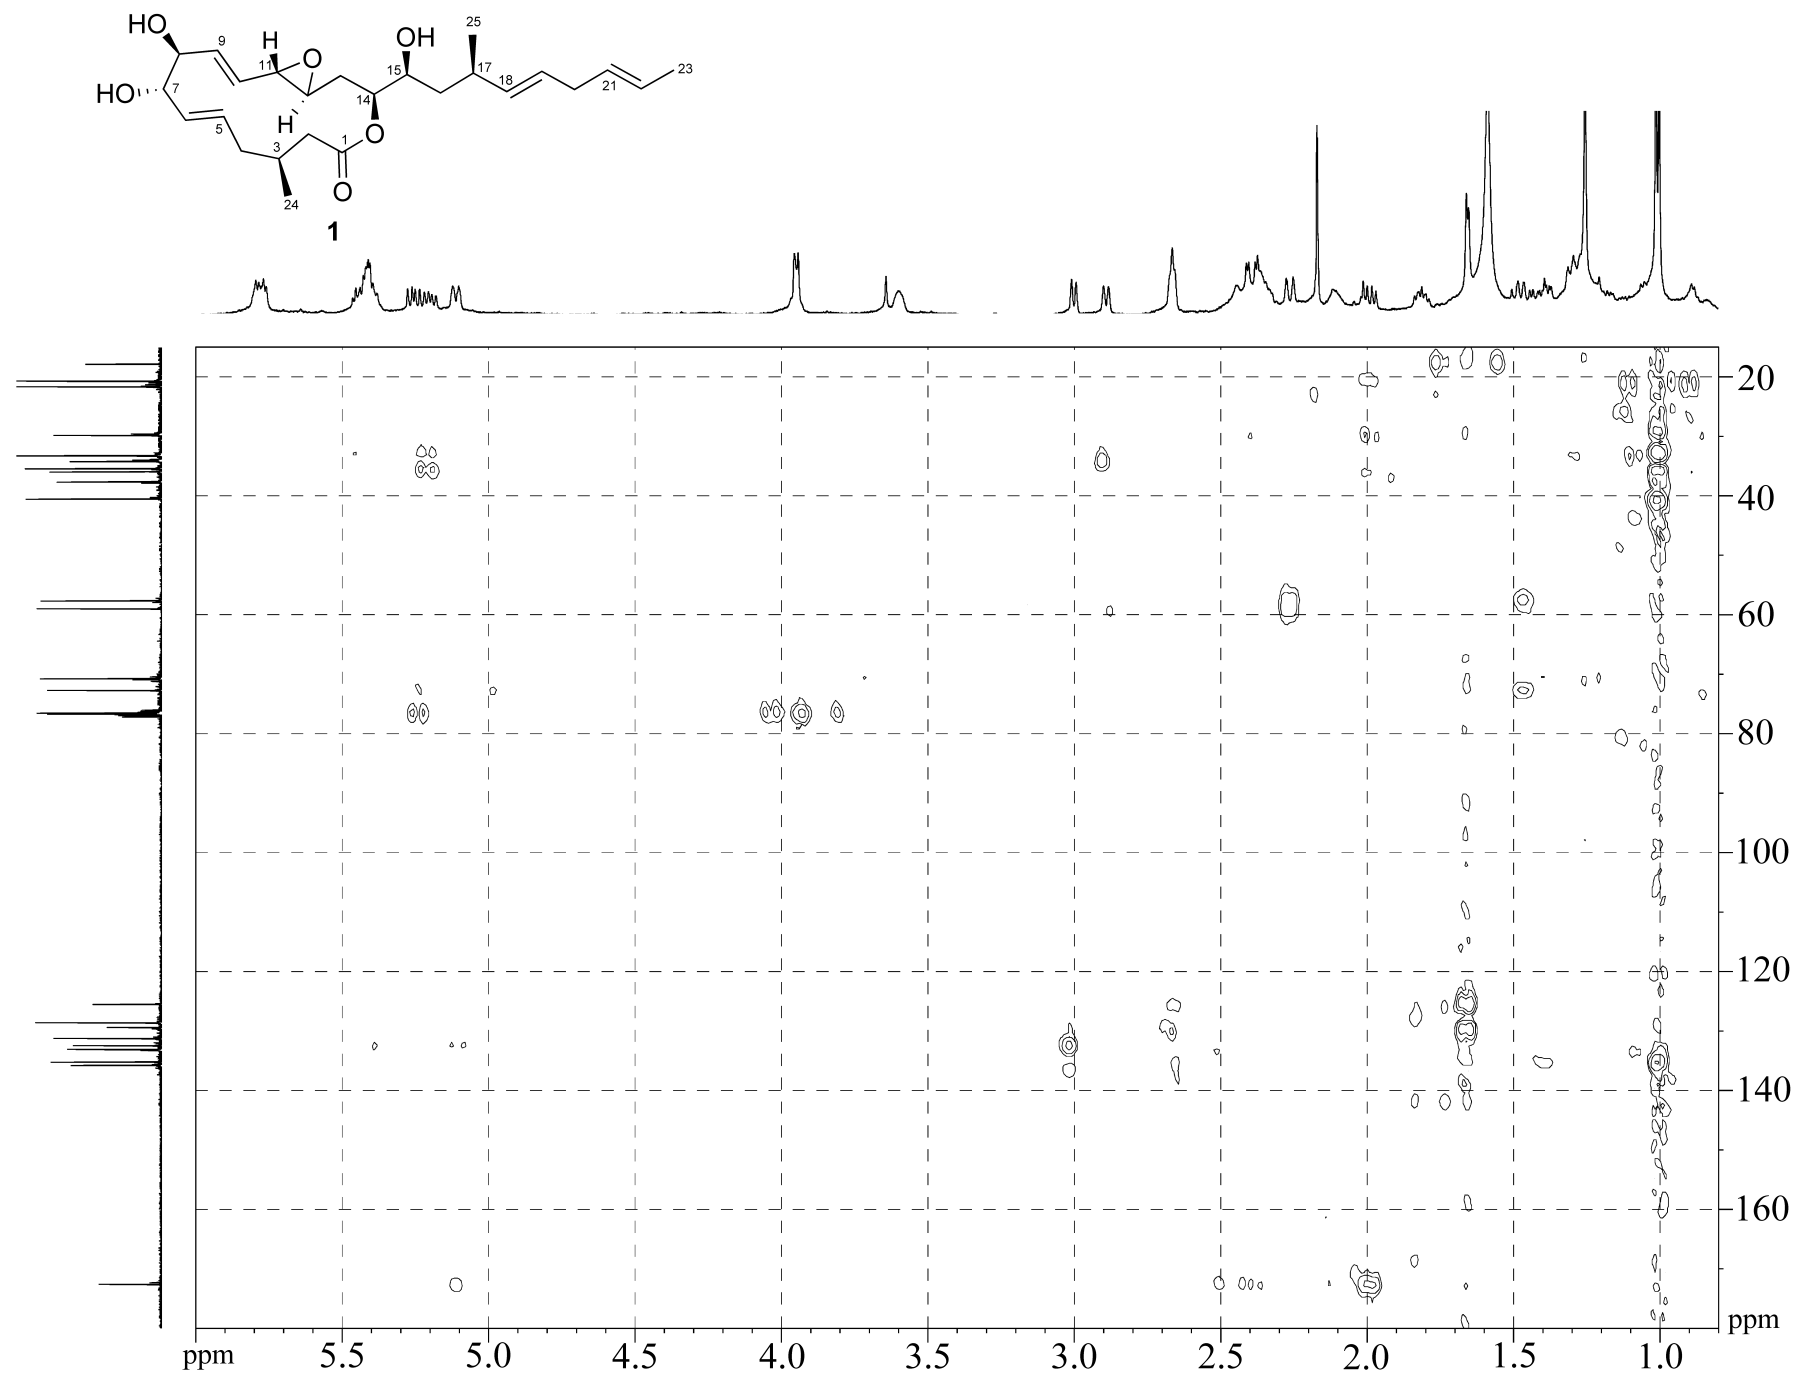

Figure S7. NOESY spectrum of iriomoteolide-3a (1) in CDCl<sub>3</sub>.

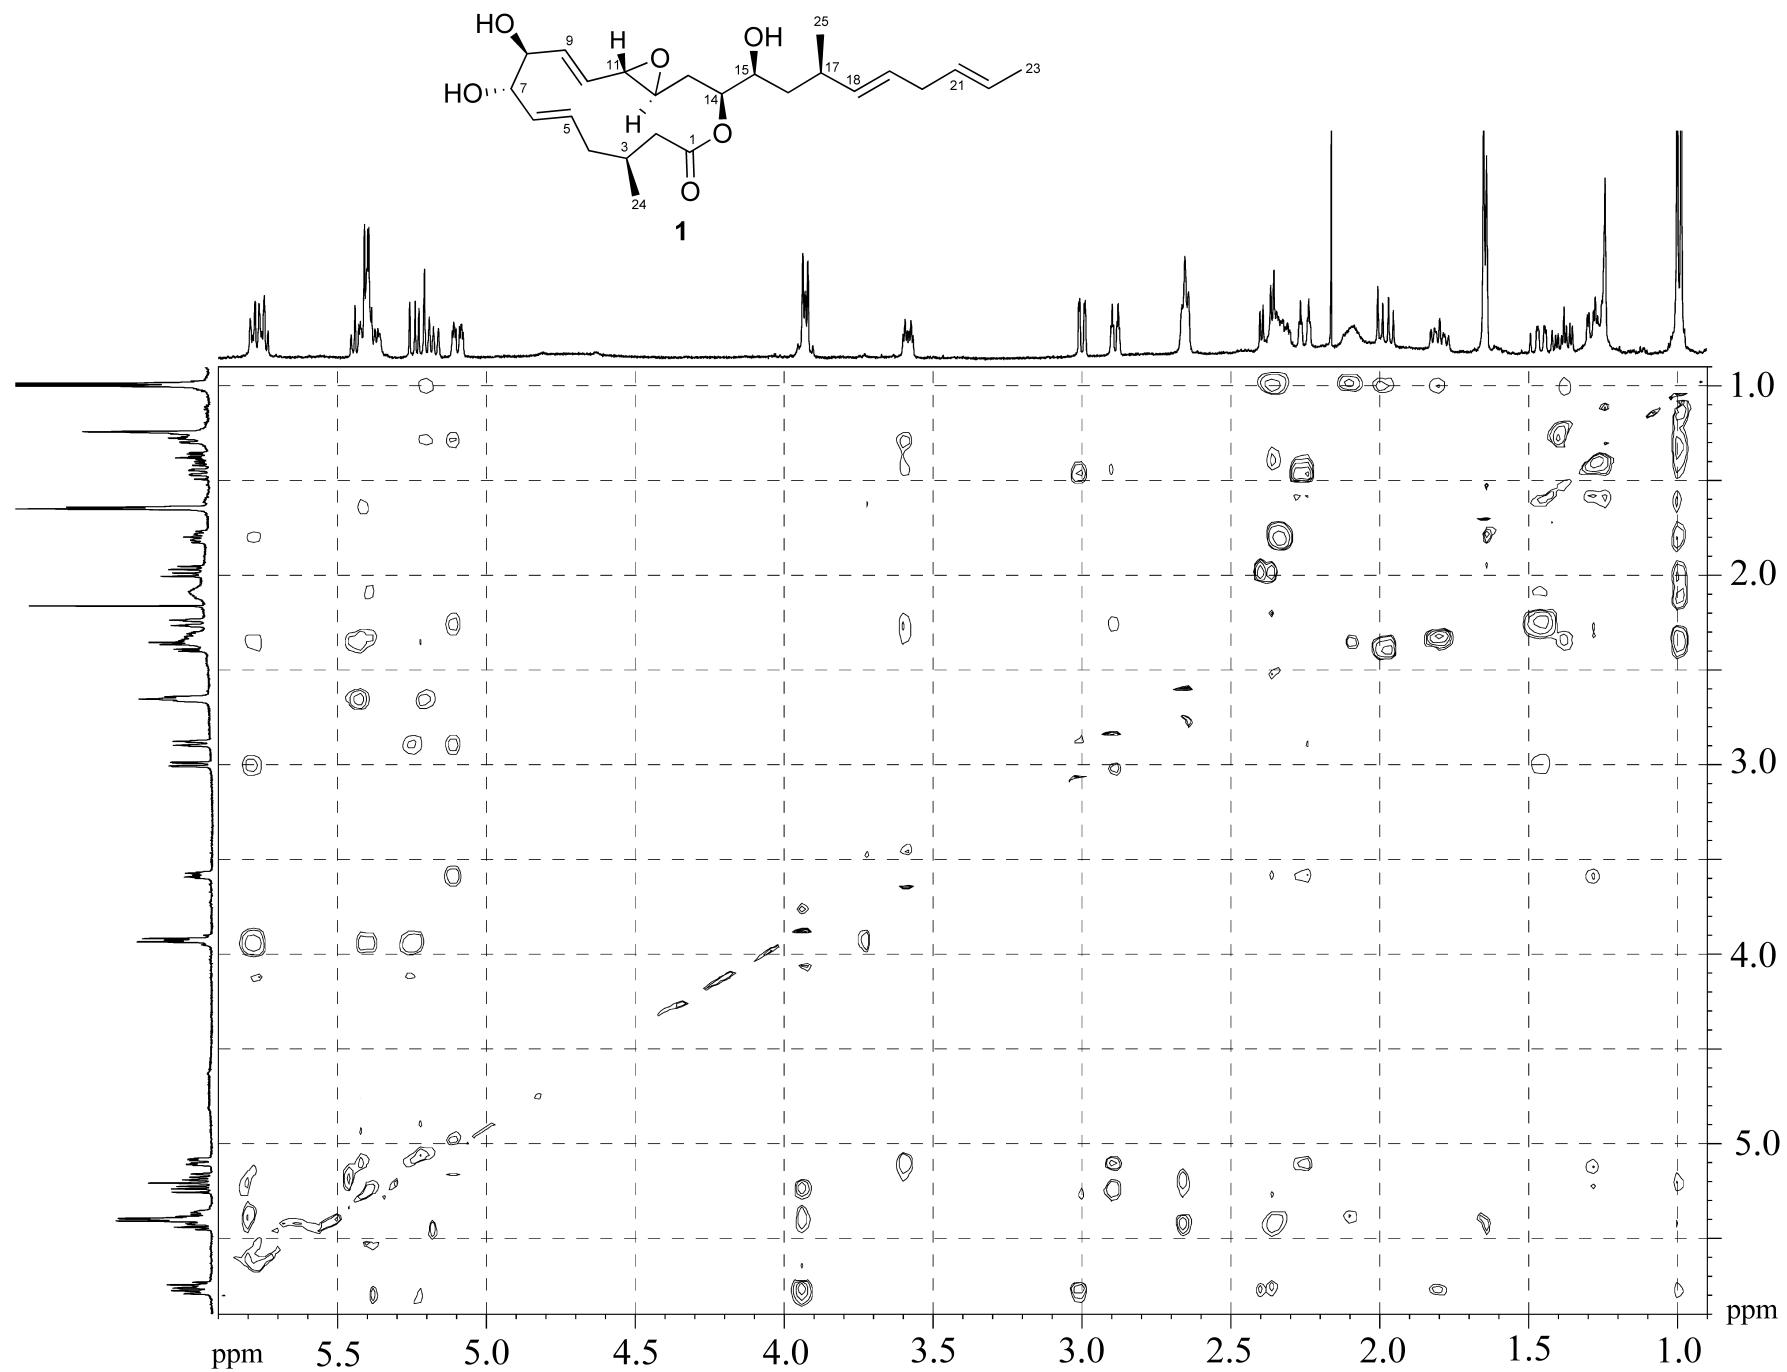

Figure S8.  $^1\text{H}$  NMR spectrum of 7,8-*O*-isopropylidene derivative (2) of iriomoteolide-3a (1) in  $\text{CDCl}_3$ .

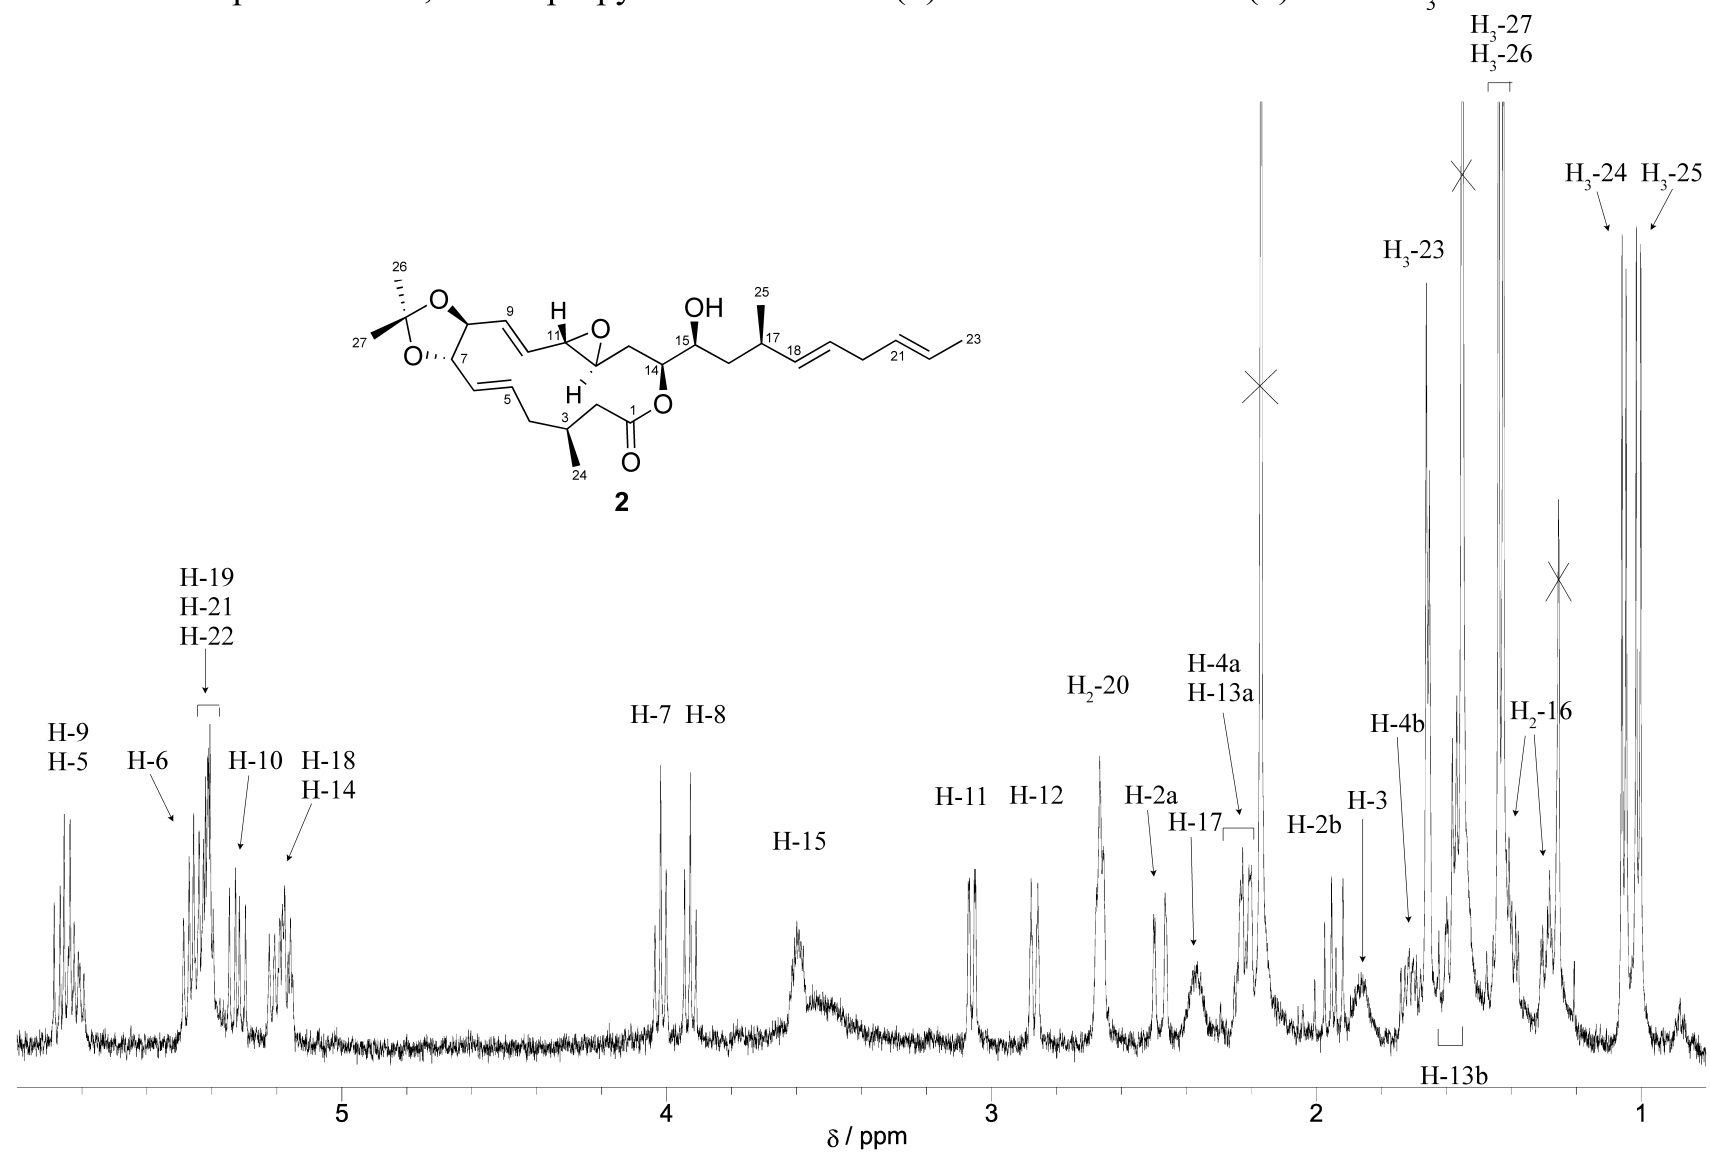

Figure S9.  $^1\text{H}$ - $^1\text{H}$  COSY spectrum of 7,8-*O*-isopropylidene derivative (2) of iriomoteolide-3a (1) in  $\text{CDCl}_3$ .

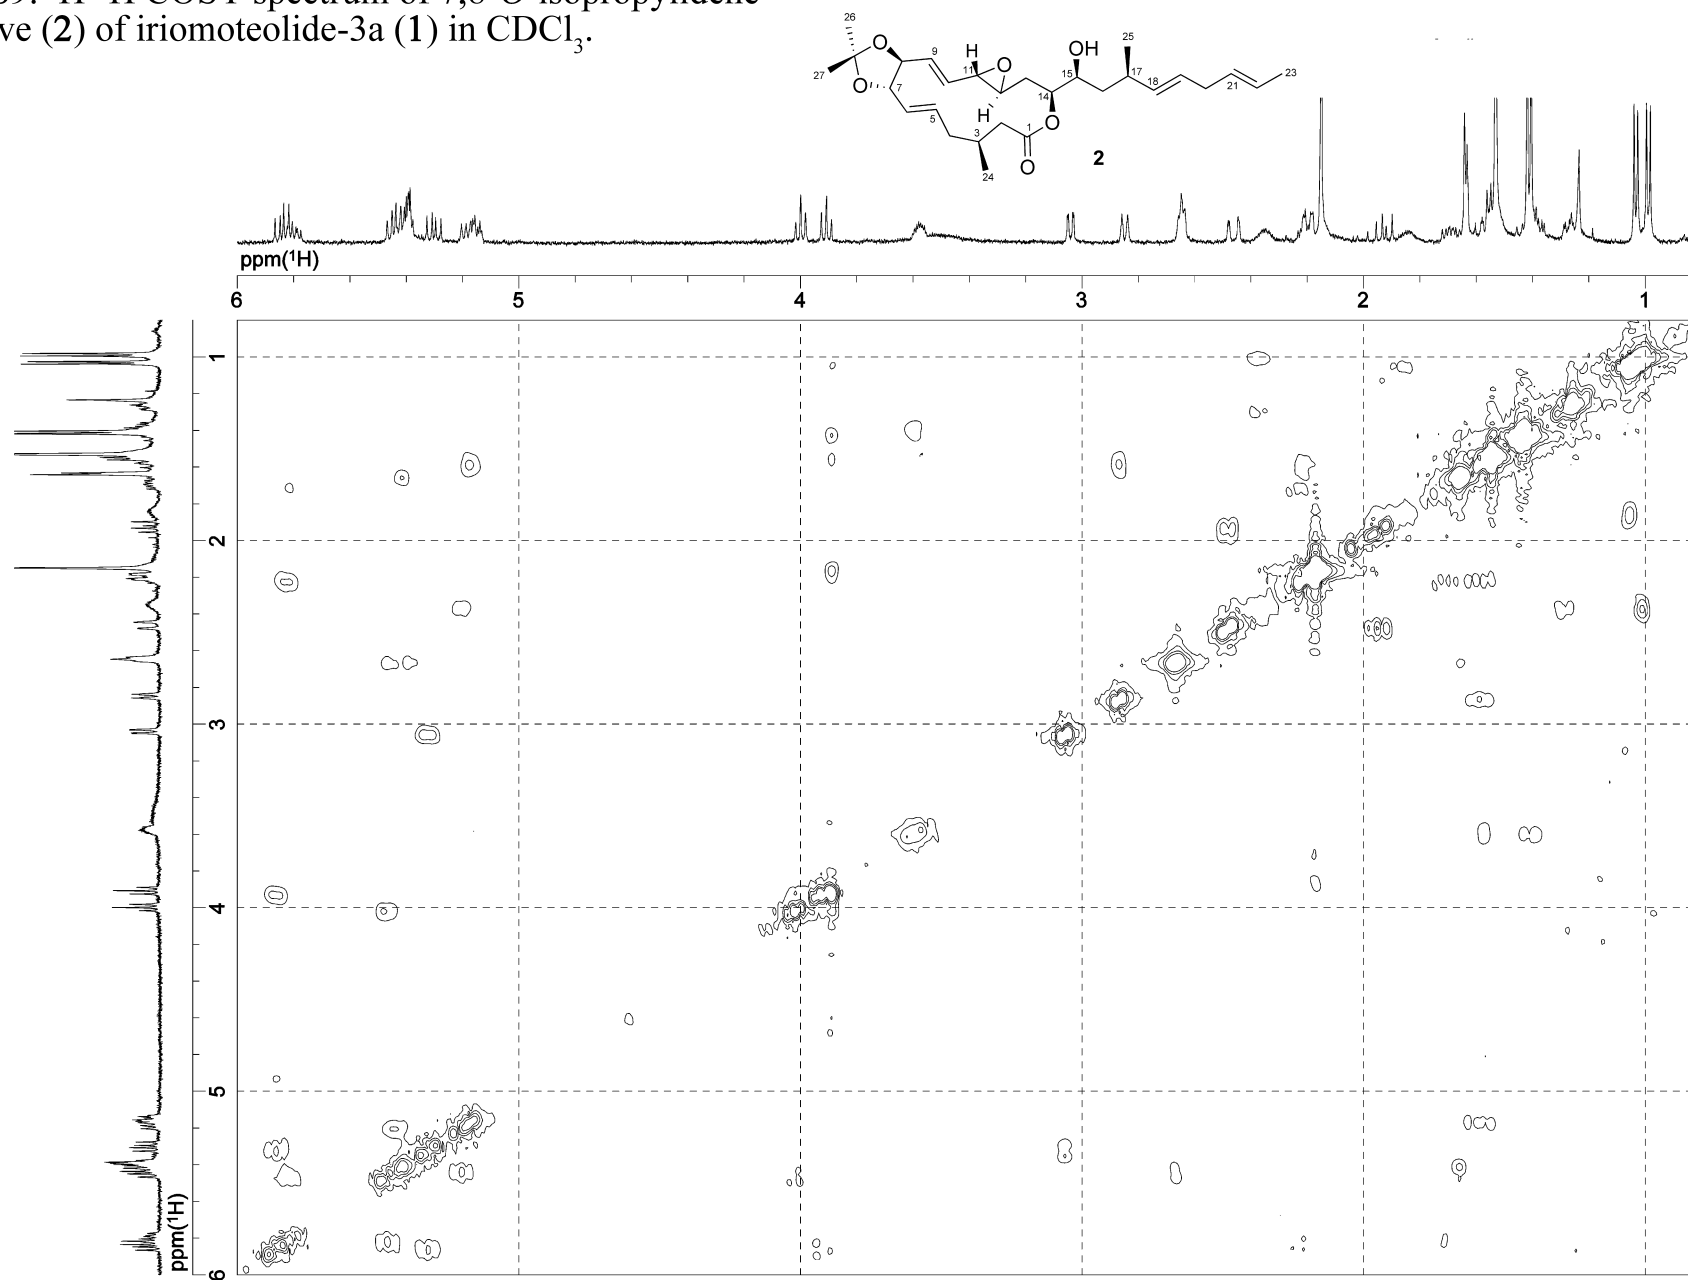

Figure S10. NOESY spectrum of 7,8-*O*-isopropylidene derivative (2) of iriomoteolide-3a (1) in CDCl<sub>3</sub>.

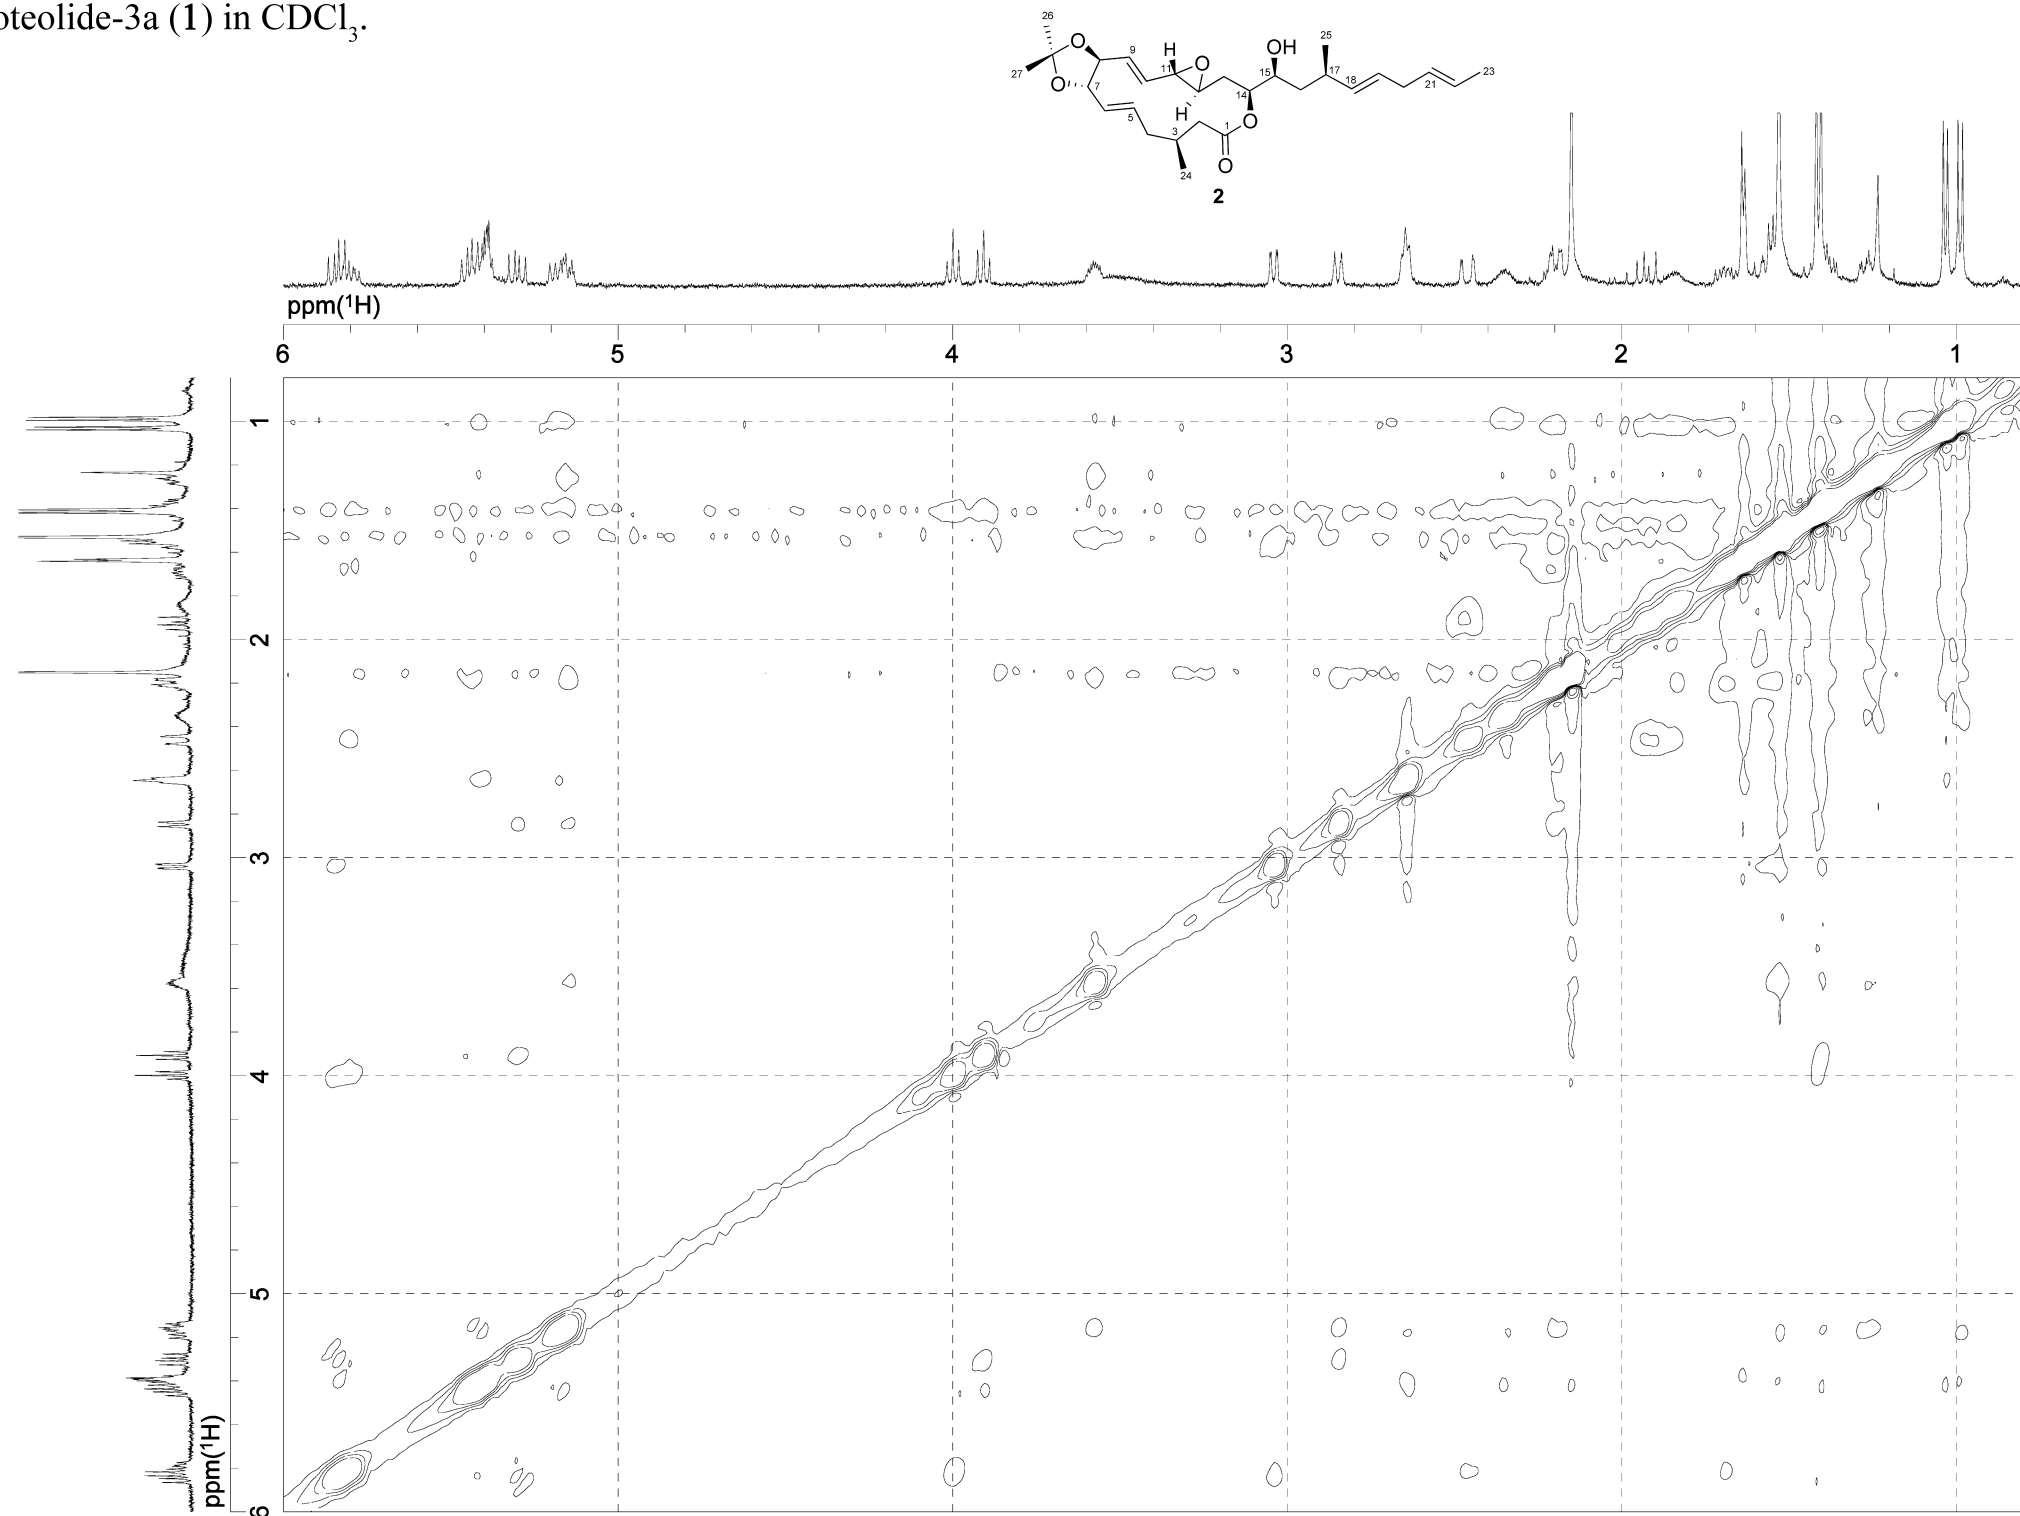

Figure S11.  $^1\text{H}$  NMR spectrum of 7,8,15-(*S*)-MTPA ester (**3a**) of iriomotelide-3a (**1**) in  $\text{CDCl}_3$ .

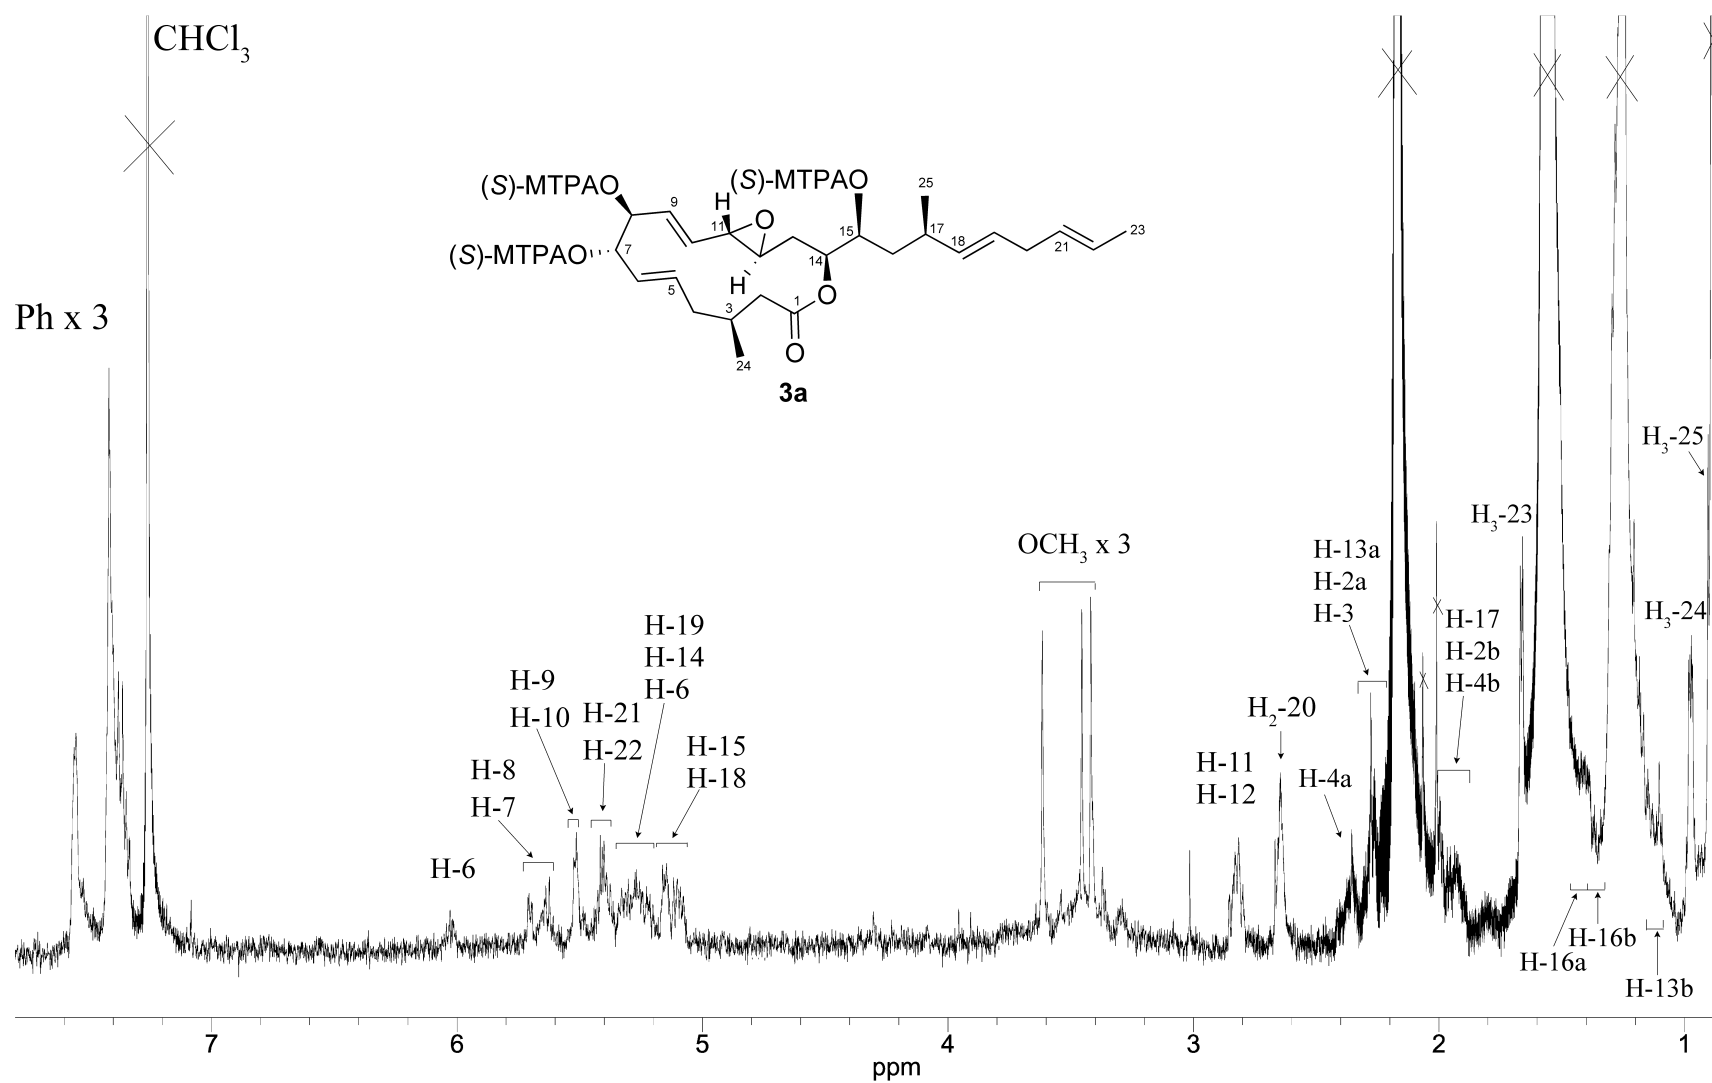

Figure S12.  $^1\text{H}$  NMR spectrum of 7,8,15-(*R*)-MTPA ester (**3b**) of iriomoteolide-3a (**1**) in  $\text{CDCl}_3$ .

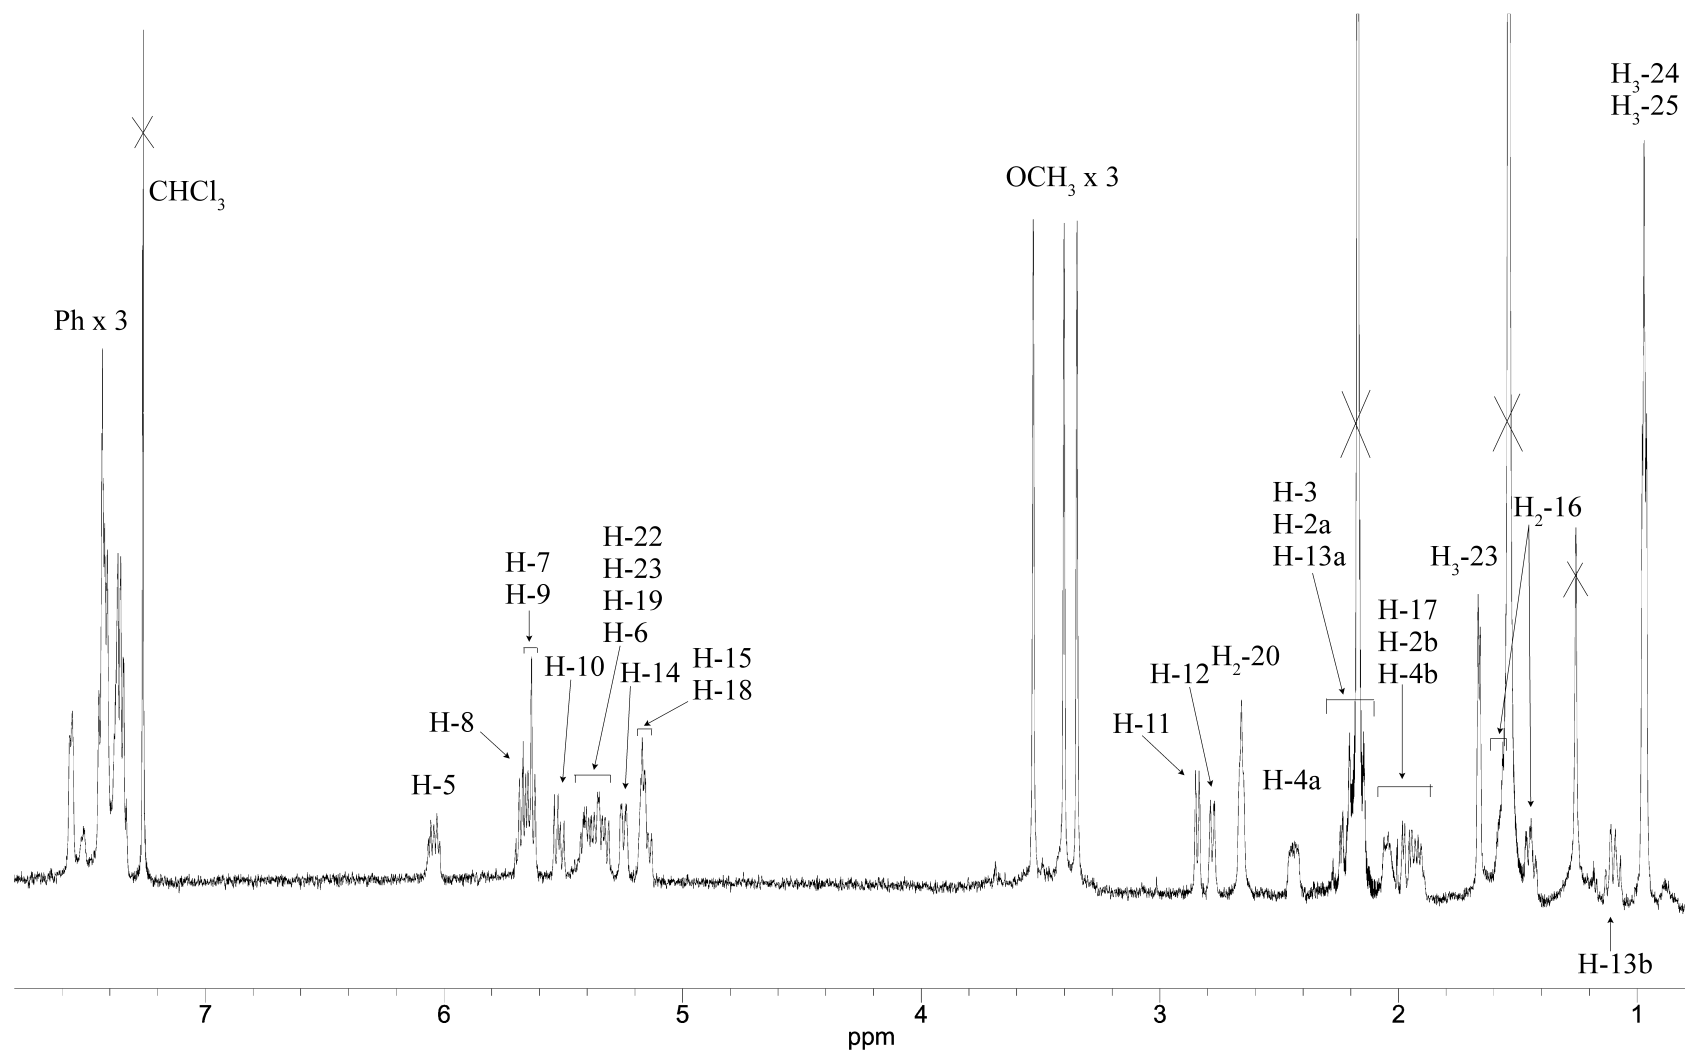

Figure S13.  $^1\text{H}$  NMR signals for H-7 and H-8 a) of natural iriomoteolide-3a (1) and b) simulated by NMRPEAK.exe program.

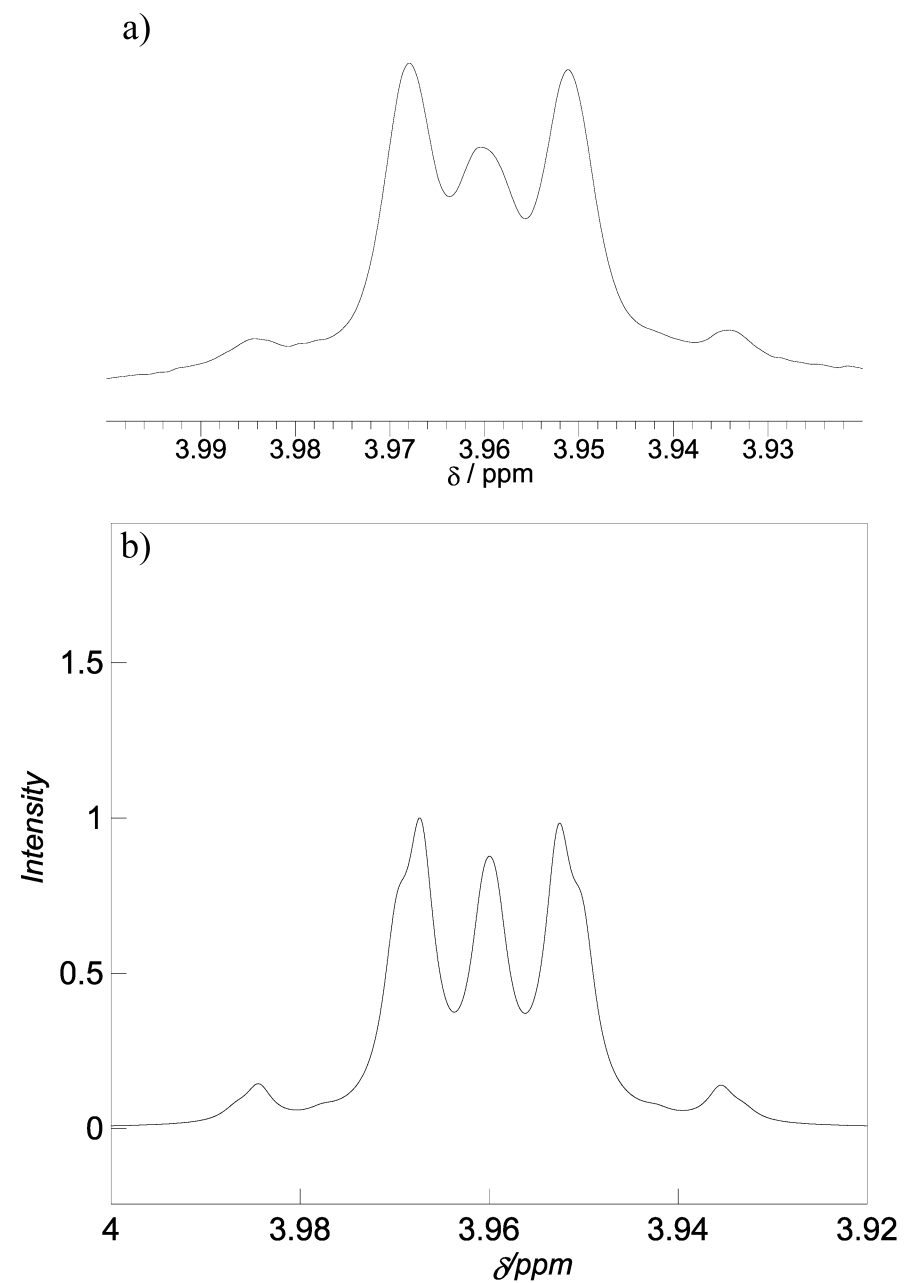

Supplement: Supplementary file 1 [file 4656295]
